# Supplementary material for: A high-output tubular triboelectric nanogenerator for wave energy collection and its application in self-powered anti-corrosion applications
Source: Royal Society of Chemistry journal article supplement (doi:10.1039/d4ta02760d), 2024-01-01
Supplement: d4ta02760d1.pdf [file d4ta02760d1.pdf]

## Supporting Information

### High-output tubular triboelectric nanogenerator for wave energy collection and its application in self-powered anti-corrosion applications

Wentao Li<sup>a,d</sup>, Yupeng Liu<sup>c,e</sup>, Weixiang Sun<sup>c</sup>, Hanchao Wang<sup>c</sup>, Wenqi Wang<sup>a,c</sup>, Jie Meng<sup>c</sup>, Xiaoqing Wu<sup>c</sup>, Chuanpeng Hu<sup>d</sup>, Daoai Wang<sup>b,c\*</sup> and Ying Liu<sup>a,\*</sup>

<sup>a</sup> Institute of Materials Science and Engineering, Ocean University of China, Qingdao 266100, China;

<sup>b</sup> Center of Materials Science and Optoelectronics Engineering, University of Chinese Academy of Sciences, Beijing 100049, China;

<sup>c</sup> State Key Laboratory of Solid Lubrication, Lanzhou Institute of Chemical Physics, Chinese Academy of Sciences, Lanzhou 730000, China;

<sup>d</sup> Shandong Laboratory of Advanced Materials and Green Manufacturing at Yantai, Yantai 264000, China.

<sup>e</sup> Key Laboratory of Rubber-Plastics of the Ministry of Education, School of Polymer Science & Engineering, Qingdao University of Science and Technology, Qingdao 266042, P. R. China

**\*Corresponding Author.** Tel: +86-931-4968169; E-mail: [wangda@licp.cs.cn](mailto:wangda@licp.cs.cn) (D. Wang); [liuyingwda@ouc.edu.cn](mailto:liuyingwda@ouc.edu.cn)(Y. Liu)

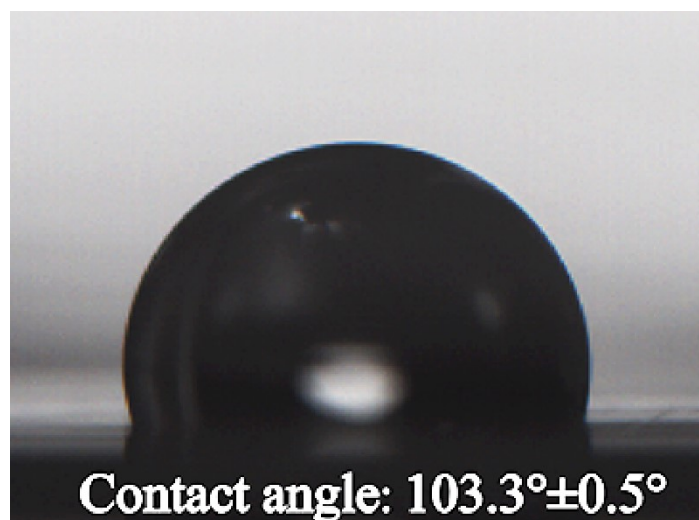

Figure S1 Contact angle of the PTFE film.

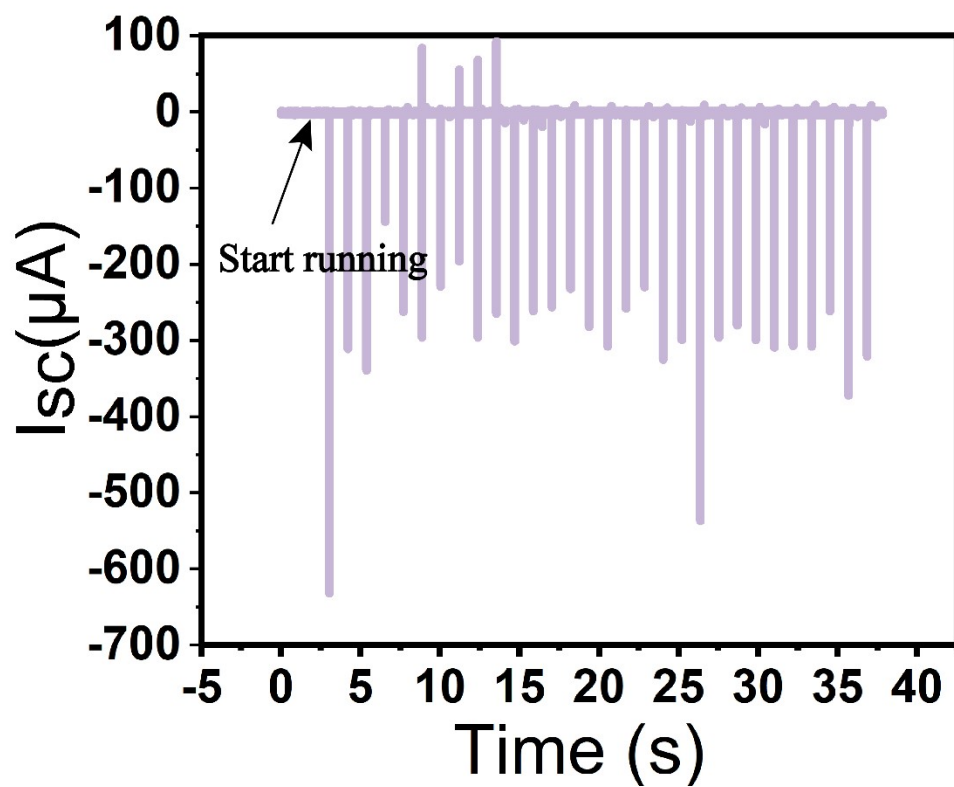

Figure S2 Pre charging process.

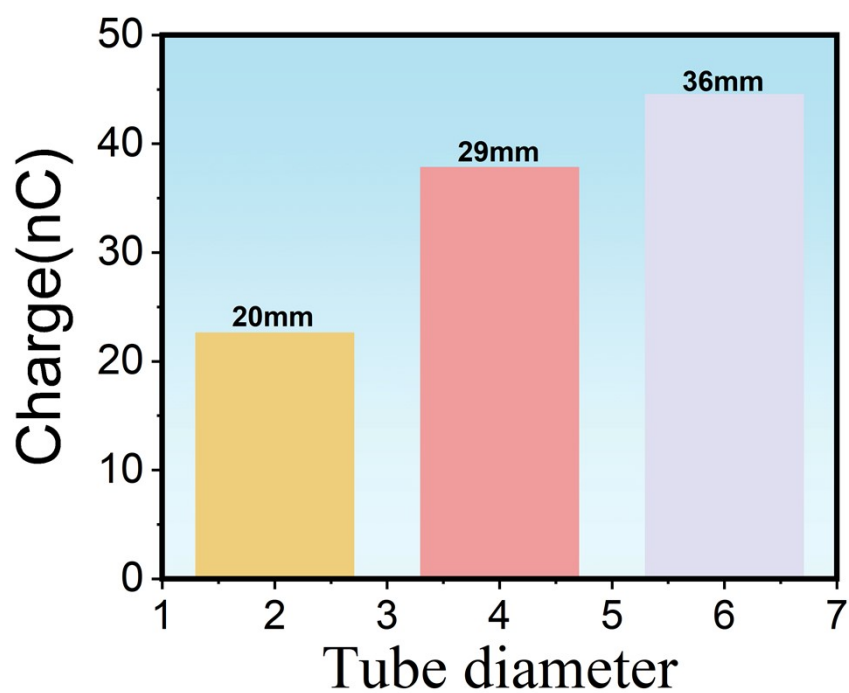

**Figure S3** The amount of charge brought about by rubbing 5 mL of tap water with PTFE tubes of different diameters.

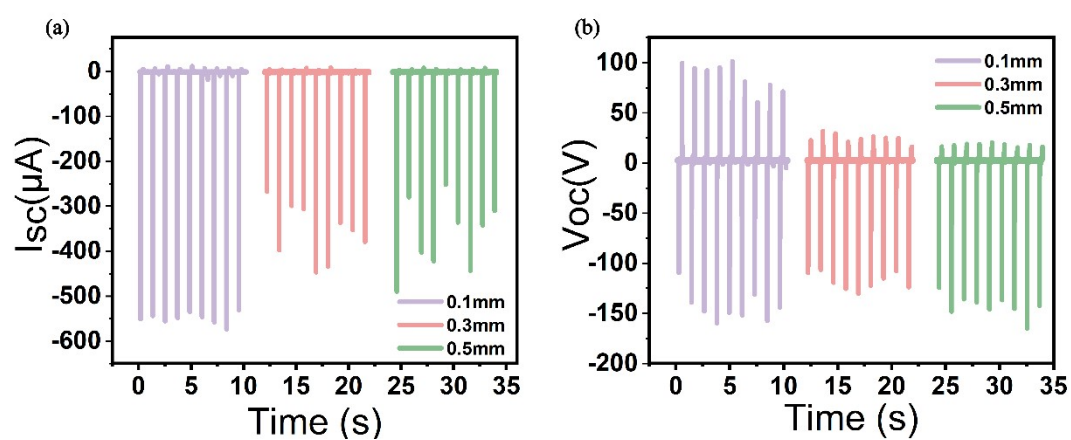

**Figure S4** The influence of membrane thickness on device output.

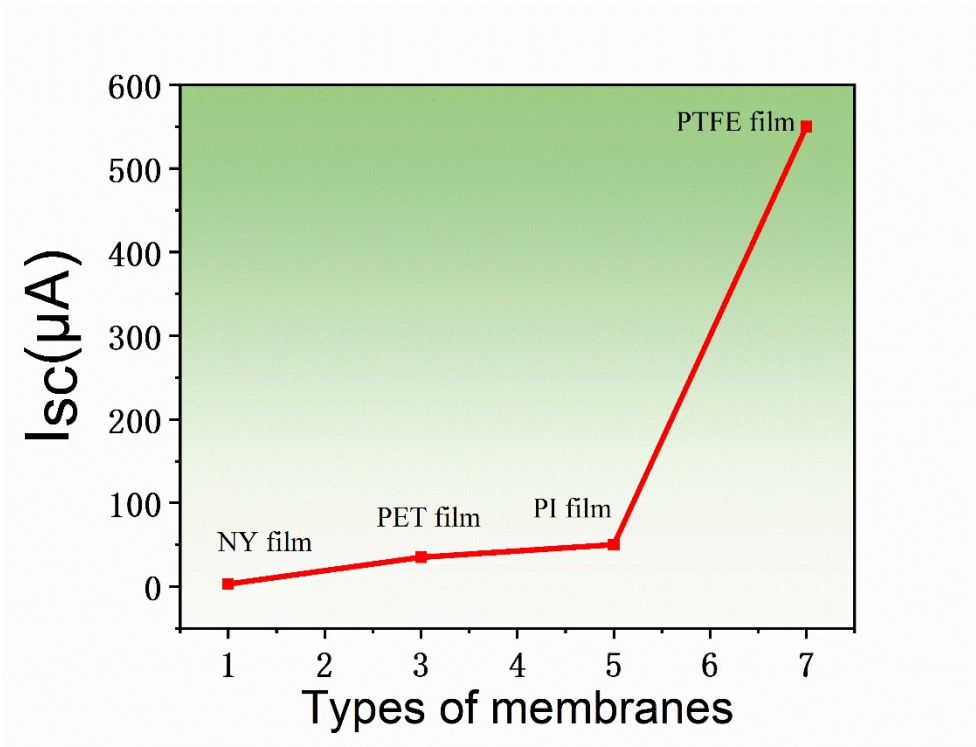

**Figure S5** The influence of types of membranes on device output.

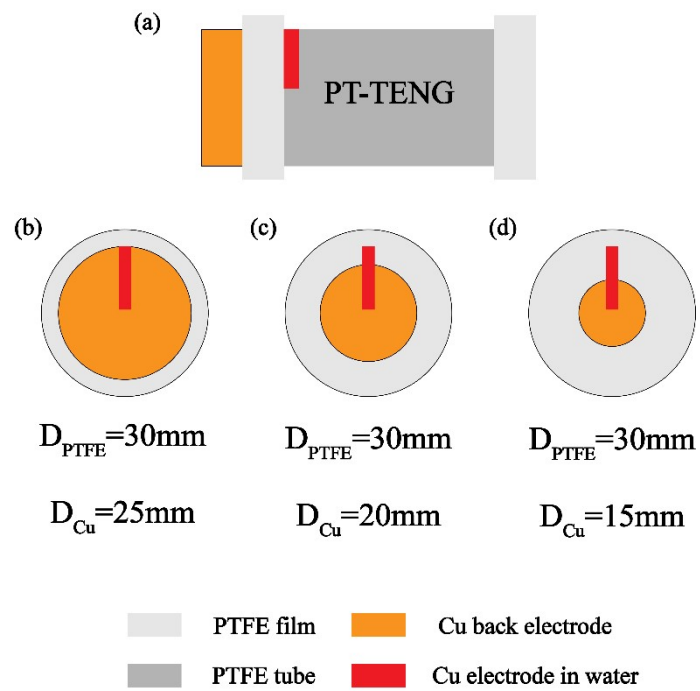

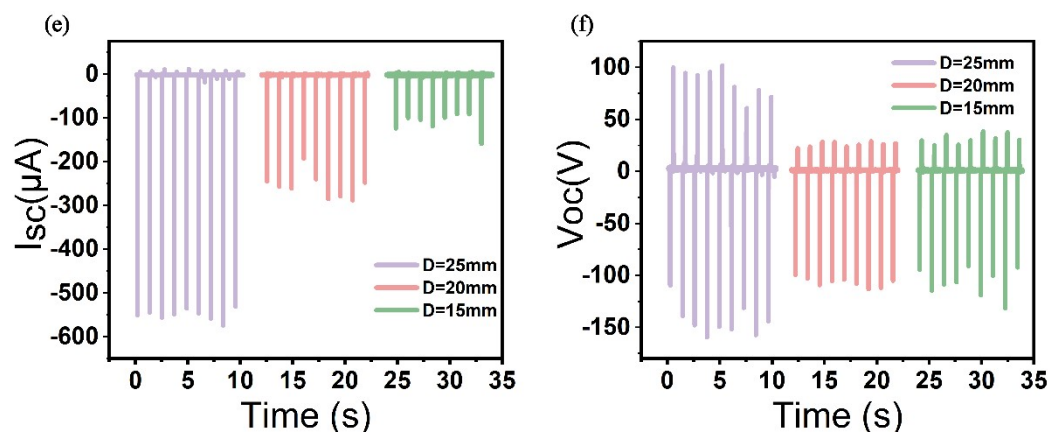

**Figure S6 The influence of back electrode area on output.** (a) Sectional view of PT-TENG. (b-d) Partial images of electrodes with diameters of 25mm, 20mm, and 15mm for Cu back electrode. (e-f) Changes in current and voltage with Cu back electrode area.

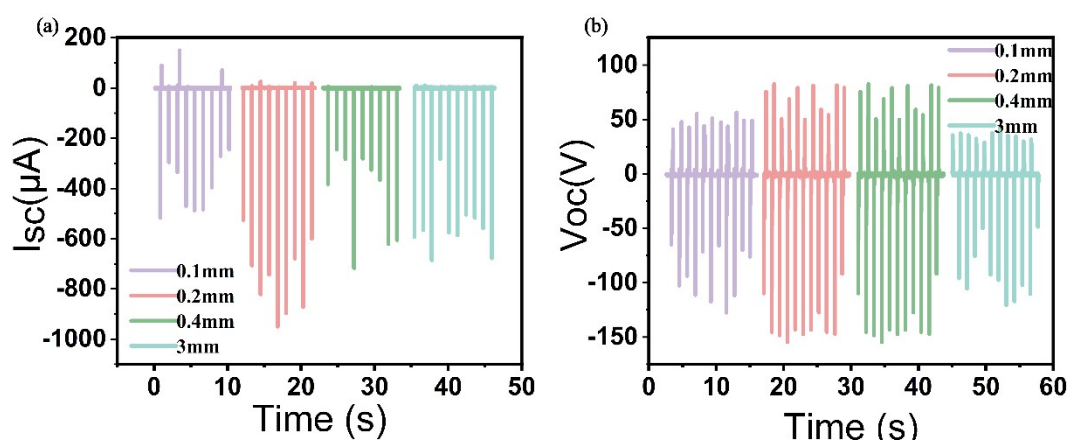

**Figure S7 (a, b) Effect of the Cu electrode width in water on the current and voltage of the PT-TENG.**

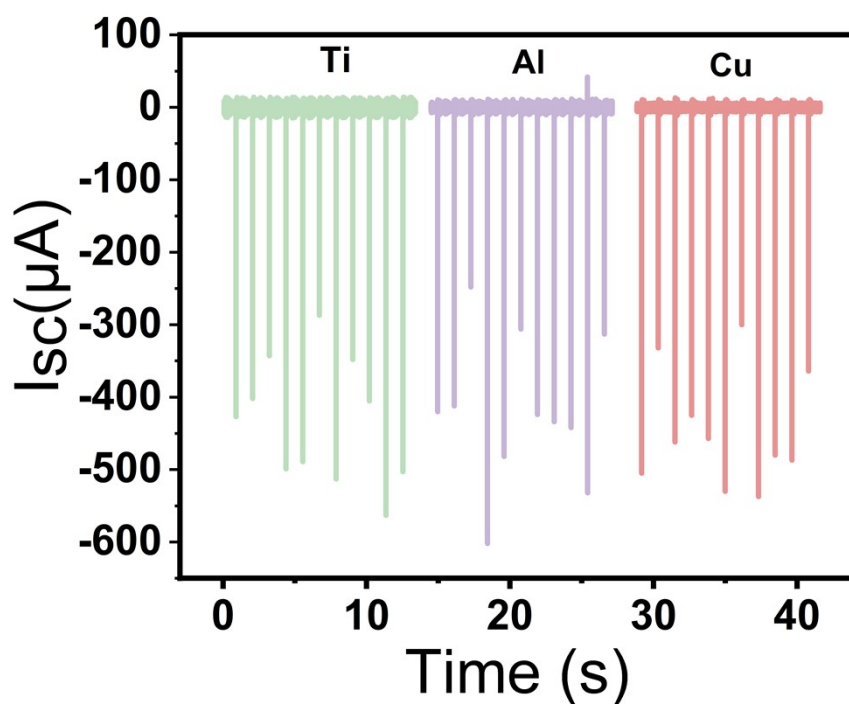

**Figure S8** Effect of the Cu electrode material in water on the current induced by the PT-TENG.

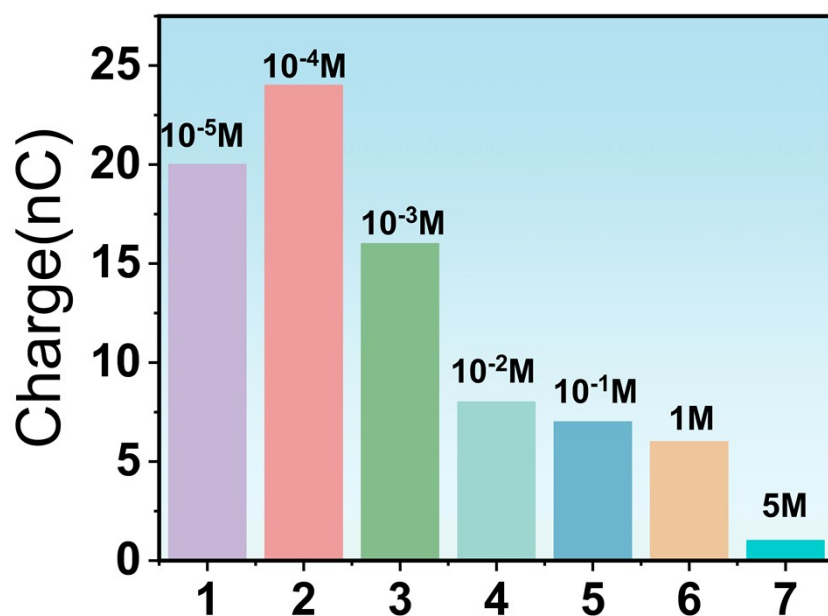

**Figure S9** Charge transfer at different concentrations of sodium chloride.

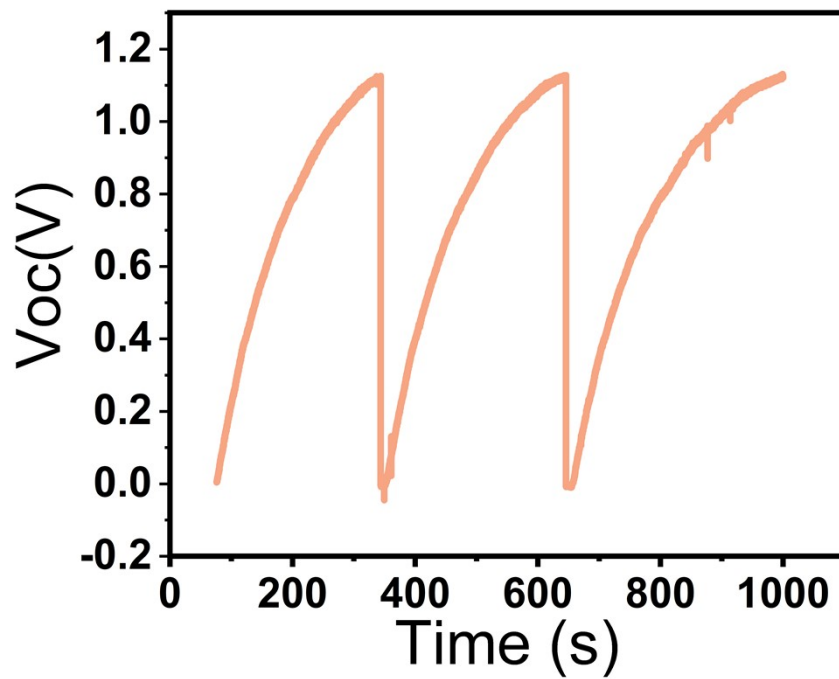

**Figure S10** Three charge and discharge cycles for a 2.2 μF capacitor.
